# Supplementary material for: Measurement report: Impact of emission control measures on environmental persistent free radicals and reactive oxygen species – A short-term case study in Beijing
Source: Copernicus journal article supplement (doi:10.5194/egusphere-2023-2703), 2024-01-02
Supplement: Supplementary file 1 [file egusphere-2023-2703-supplement.pdf]

# Measurement report: Impact of emission control measures on environmental persistent free radicals and reactive oxygen species – A short-term case study in Beijing

Yuanyuan Qin<sup>1</sup>, Xinghua Zhang<sup>2</sup>, Wei Huang<sup>3</sup>, Juanjuan Qin<sup>1</sup>, Xiaoyu Hu<sup>1</sup>, Yuxuan Cao<sup>1</sup>, Tianyi Zhao<sup>1,5</sup>,  
5 Yang Zhang<sup>1,6</sup>, Jihua Tan<sup>1</sup>, Ziyin Zhang<sup>4</sup>, Xinming Wang<sup>5</sup>, Zhenzhen Wang<sup>7</sup>

<sup>1</sup>College of Resources and Environment, University of Chinese Academy of Sciences, Beijing, 100049, China

<sup>2</sup>Sinopec (Dalian) Research Institute of Petroleum and Petrochemicals Co., Ltd, Dalian, 116045, China

<sup>3</sup>Institute of Environmental Reference Materials of Environmental Development Centre of Ministry of Ecology and Environment, Beijing, 100029, China

10 <sup>4</sup>Institute of Urban Meteorology, China Meteorological Administration, Beijing, 100089, China

<sup>5</sup>Guangzhou Institute of Geochemistry, Chinese Academy of Sciences, Guangzhou, 510640, China

<sup>6</sup>Beijing Yanshan Earth Critical Zone National Research Station, Beijing, 101408, China

<sup>7</sup>School of Environmental Engineering, Changsha Environmental Protection Vocational College, Changsha, 410004, China

*Correspondence to:* Yang Zhang (zhangyang@ucas.ac.cn) and Jihua Tan (tanjh@ucas.ac.cn)

15

20

25

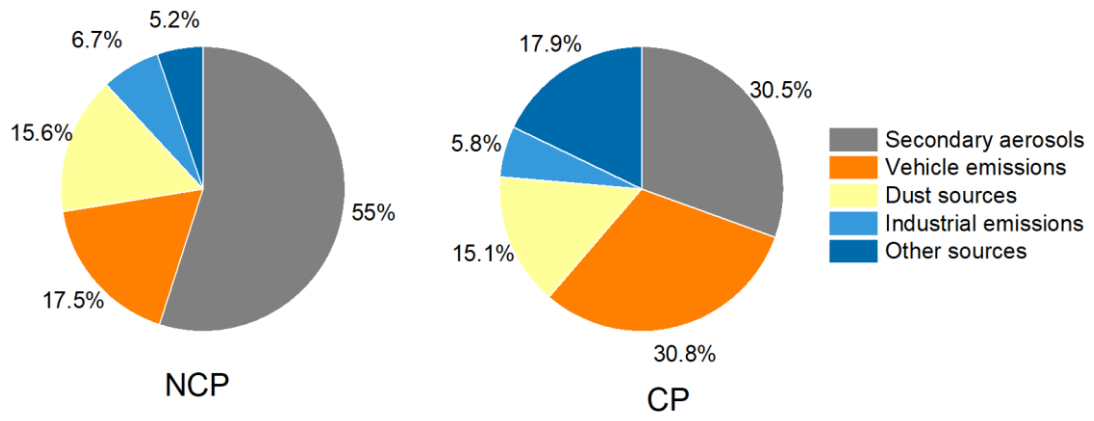

**Figure S1: The contributions of different sources to PM<sub>2.5</sub> during NCP and CP.**

30

35

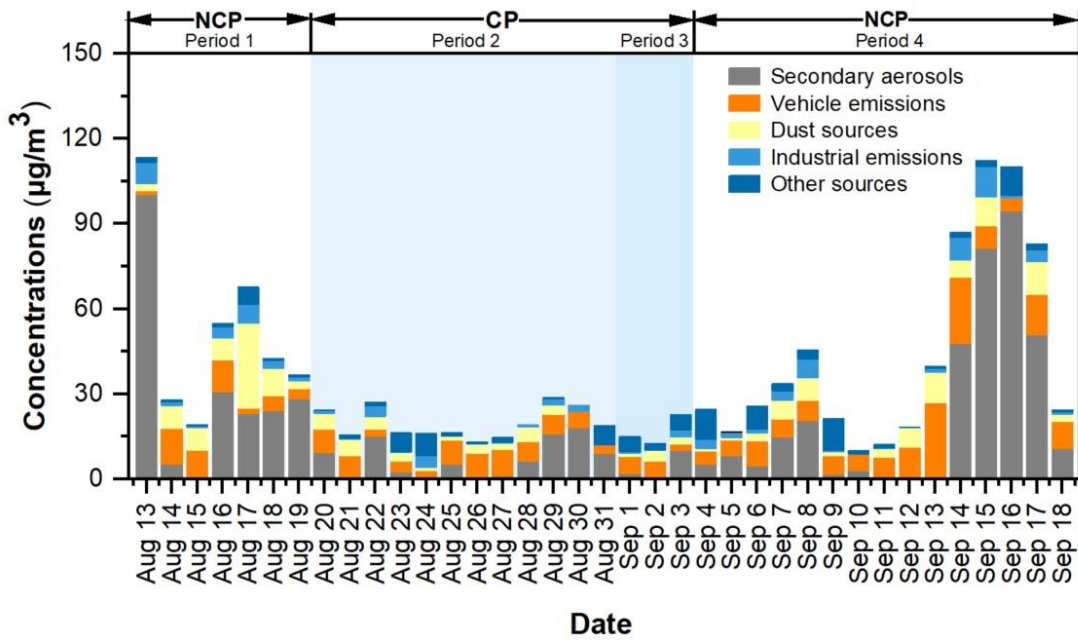

Figure S2: Time series of the source contributions to PM<sub>2.5</sub>.

40

45

50

55

**Table S1: Sampling schedule.**

| Sampling time  | Period   | Number of samples (n) |
|----------------|----------|-----------------------|
| 2015.8.13-8.19 | Period 1 | 14                    |
| 2015.8.20-8.31 | Period 2 | 24                    |
| 2015.9.1-9.3   | Period 3 | 6                     |
| 2015.9.4-9.19  | Period 4 | 32                    |

60

65

70

75

80

85

**Table S2: Descriptions of control measures implemented in different periods. “√” denotes the control.**

| Control measures            |                                              | Period 1 | Period 2 | Period 3 | Period 4 |
|-----------------------------|----------------------------------------------|----------|----------|----------|----------|
| Long-term routine measures  |                                              | √        | √        | √        | √        |
|                             | Odd-and-even plate rule for vehicle use      |          | √        | √        |          |
|                             | Polluting industry restriction               |          | √        | √        |          |
|                             | Construction sites shutdown                  |          | √        | √        |          |
| Short-term routing measures | Delay of school opening                      |          | √        | √        |          |
|                             | Vacation days off                            |          |          | √        |          |
|                             | More frequent road sprinkling                |          | √        | √        |          |
|                             | Road traffic control around Tiananmen Square |          |          | √        |          |
|                             | Museum and tourist attraction closeds        |          |          | √        |          |
|                             | Enhanced measures in surrounding cities      |          |          | √        |          |
